# Supplementary material for: Crystallization of Poly(ε-caprolactone) in Poly(vinylidene fluoride)/Poly(ε-caprolactone) Blend
Source: PubMed Central journal article supplement (PMC6432374; doi:10.3390/polym9020042), 2017-01-28
Supplement: polymers-09-00042-s001.pdf [file polymers-09-00042-s001.pdf]

## Supplementary Materials: Crystallization of Poly( $\epsilon$ -caprolactone) in Poly(vinylidene fluoride)/Poly( $\epsilon$ -caprolactone) Blend

Yang Kong, Yangmin Ma, Lele Lei, Xuechuan Wang and Haijun Wang

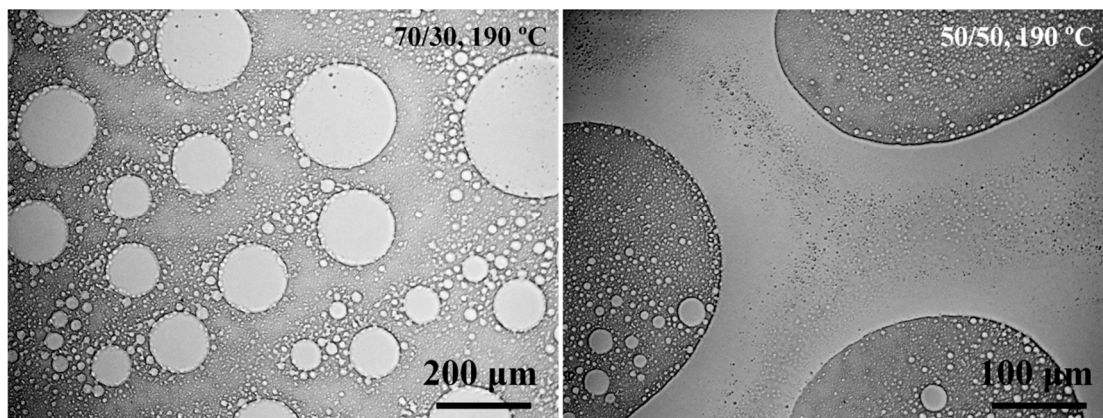

**Figure S1.** Phase separation morphologies in the 70/30 and 50/50 PVDF/PCL blend at 190 °C.
